# Supplementary material for: A short-range ordered–disordered transition of a NiOOH/Ni(OH)2 pair induces switchable wettability
Source: Royal Society of Chemistry journal article supplement (doi:10.1039/c4nr05261g), 2014-01-01
Supplement: c4nr05261g1.pdf [file c4nr05261g1.pdf]

## Supporting Information

### Short-Range Ordered-Disordered Transition of NiOOH/Ni(OH)<sub>2</sub> Pair Induces Switchable Wettability

Ya-Huei Chang,<sup>a</sup> Nga Yu Hau,<sup>a</sup> Chang Liu,<sup>a</sup> Yu-Ting Huang,<sup>a</sup> Chien-Cheng Li,<sup>a</sup> Kaimin Shih,<sup>b</sup> Shien-Ping Feng<sup>\*, a</sup>

#### Contents

##### (1) Supplementary Figures and Table

**Figure S1.** Plating profile of amorphous and nanoporous NiOOH.

**Figure S2.** Long-term stability and cycling test.

**Figure S3.** Roughness of FTO and stainless steel.

**Figure S4.** A photograph of shape deformation on rough SS before detachment, leading to the calculated adhesion force between the water droplet and Ni(OH)<sub>2</sub>/SS of 33 μN.

**Figure S5.** Conventional XRD of as-prepared film and its exposure to high EC for 1 hr, and to UVO<sub>3</sub> for 10 mins.

**Figure S6.** (a) Ordered Ni-LDH, (b) turbostratic disordered Ni(OH)<sub>2</sub> and (c) short-range disordered Ni(OH)<sub>2</sub> where the basal planes face the air at a certain angle.

**Figure S7.** A photograph of the smiling pattern with wet eyes and mouth on a dry face.

**Figure S8.** (a) Cathodic waves of cyclic voltammetry for nickel. The inset is a photograph of the nickel strips. (b) Gold nanoparticles suspended on the scaffolds of hydrophobic Ni(OH)<sub>2</sub> at -2V.

**Table S1.** Summary of the O 1s peak fitting results for the O<sup>2-</sup>, OH<sup>-</sup> and hydroscopic H<sub>2</sub>O.

##### (2) Supplementary Videos

**Video S2.** The proof of good water-repellancy between the Ni(OH)<sub>2</sub>/SS and the water droplet.

**Video S3.** The real-record of 2D microfluidic channels with optical microscopy.

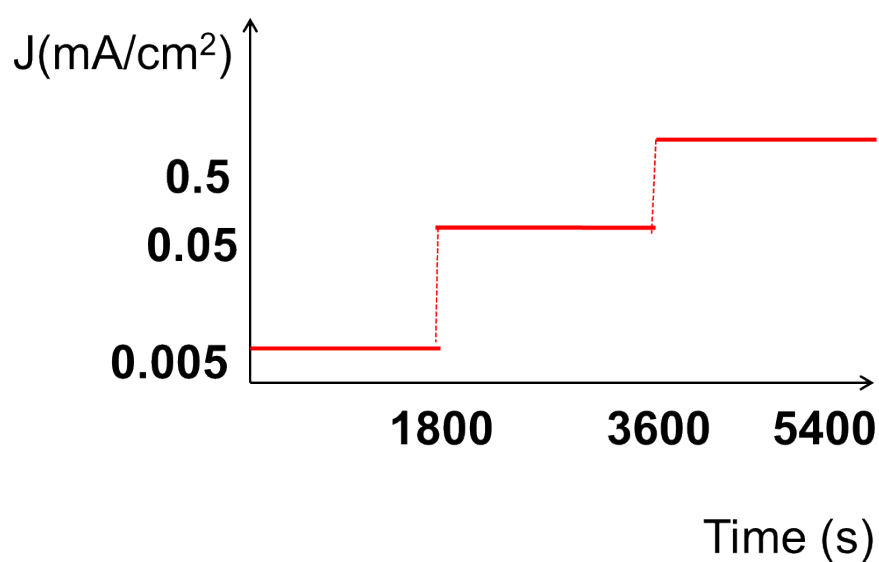

**Figure S1.** Plating profile of amorphous and nanoporous NiOOH.

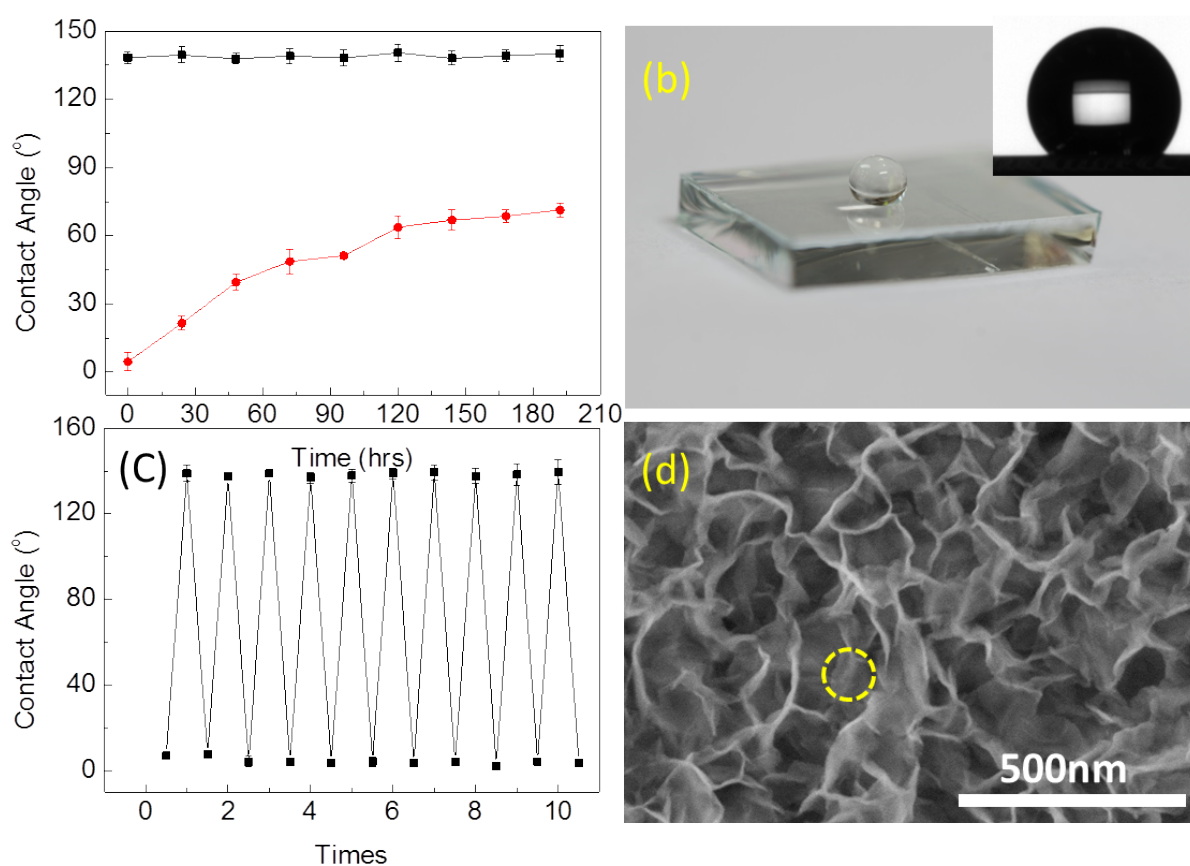

**Fig. S2.** (a) Long-term stability of wetting state (NiOOH/FTO) and dewetting state ((Ni(OH)<sub>2</sub>)/FTO) stored at ambient atmosphere during 8 days. (b) Dewetting state (Ni(OH)<sub>2</sub>) stored at ambient atmosphere after 3 months. (c) Cycling test upon environmental chamber and UV/ozone alternatively. (d) FE-SEM image of hydrophobic Ni(OH)<sub>2</sub> film with micro-collapse after thermally cycling test.

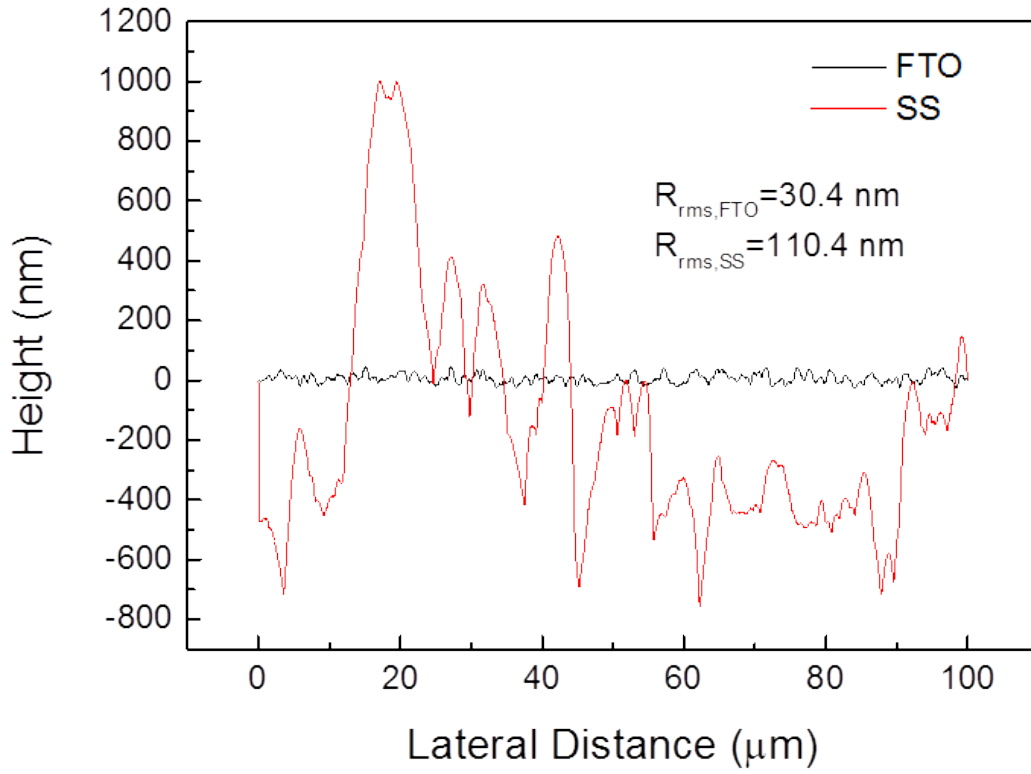

**Figure S3.** Roughness of FTO and stainless steel.

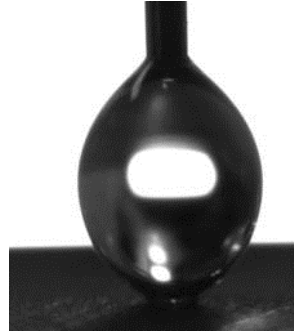

**Figure S4.** A photograph of shape deformation on rough SS before detachment, leading to the calculated adhesion force between the water droplet and Ni(OH)<sub>2</sub>/SS of 33μN by balancing vertical forces, as shown in equation (S1)

where  $\gamma$  is surface tension of water.  $R_x$  and  $R_y$  are the principal radii of curvature. The last term represents the gravitational force acting on the lower part of the water droplet, where  $\rho$  and  $V$  are the density and volume of lower part of water droplet, and  $g$  is the gravitational acceleration.

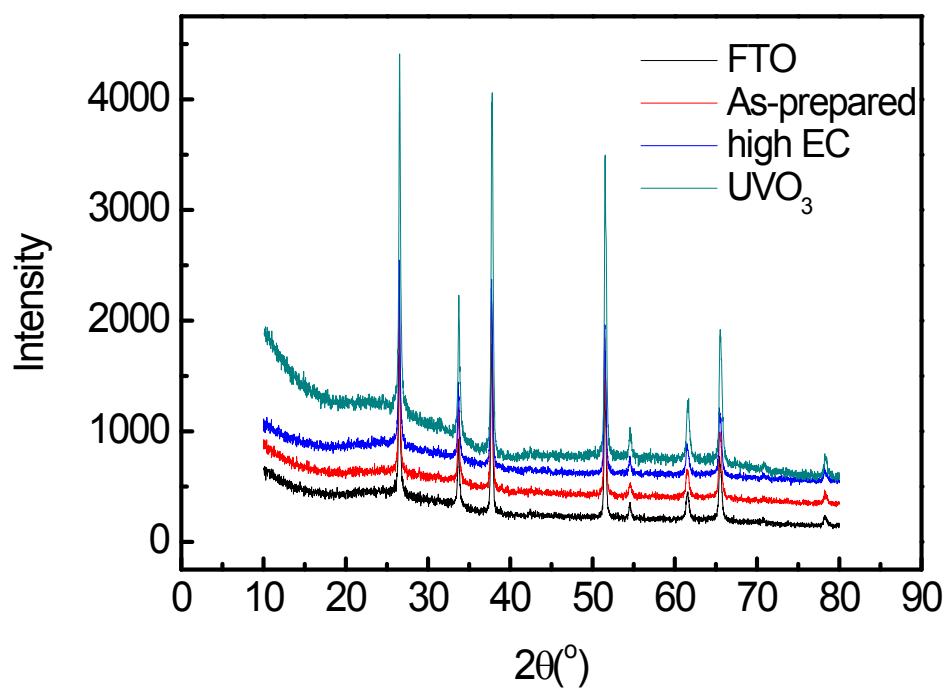

**Figure S5.** Conventional XRD of as-prepared film and its exposure to high EC for 1 hr, and to UVO<sub>3</sub> for 10 mins.

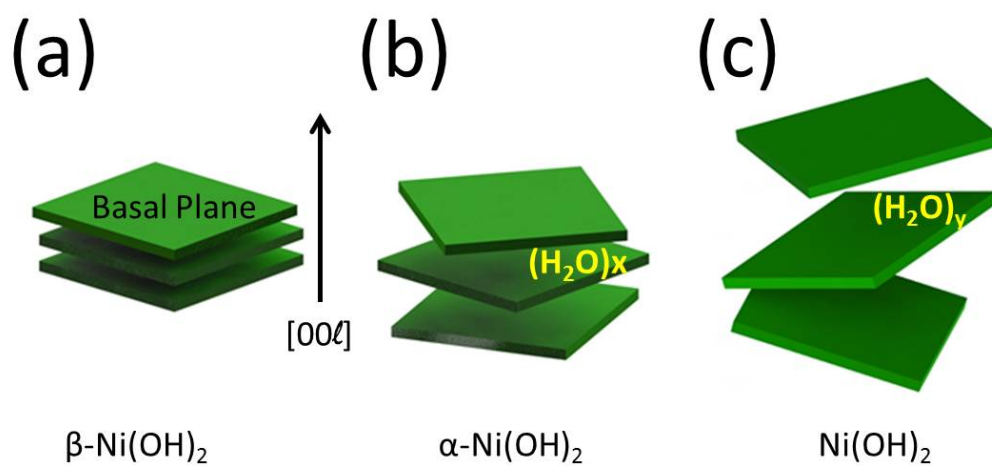

**Figure S6.** (a) Ordered Ni-LDH, (b) turbostratic disordered Ni(OH)<sub>2</sub> and (c) short-range disordered Ni(OH)<sub>2</sub> where the basal planes face the air at a certain angle.

**Table S1.** Summary of the O 1s peak fitting results for the  $\text{O}^{2-}$ ,  $\text{OH}^-$  and hydroscopic  $\text{H}_2\text{O}$ .

| Sample/Area    | $\text{O}^{2-}$ | $\text{OH}^-$ | hydroscopic<br>$\text{H}_2\text{O}$ | $\text{O}^{2-}/\text{OH}^-$ |
|----------------|-----------------|---------------|-------------------------------------|-----------------------------|
| As-prepared    | 22,480          | 23,286        | 4,642                               | 0.97                        |
| High EC        | 0               | 45,120        | 0                                   | 0                           |
| $\text{UVO}_3$ | 11,273          | 35,344        | 5,532                               | 0.32                        |

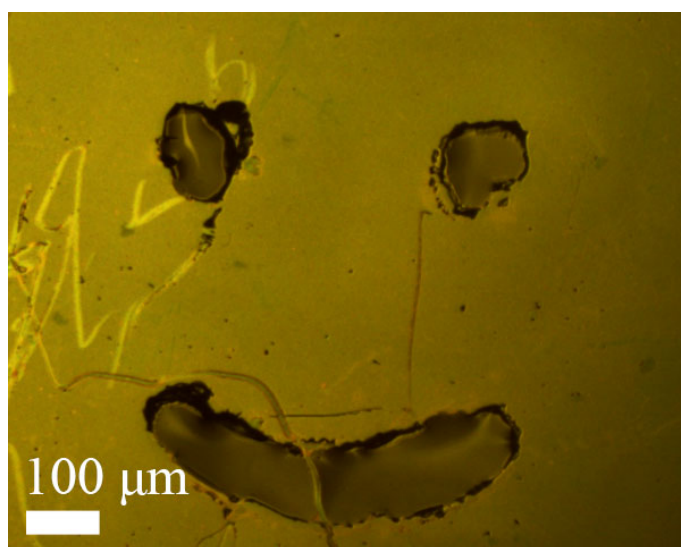

**Figure S7.** A photograph of the smiling pattern with wet eyes and mouth on a dry face.

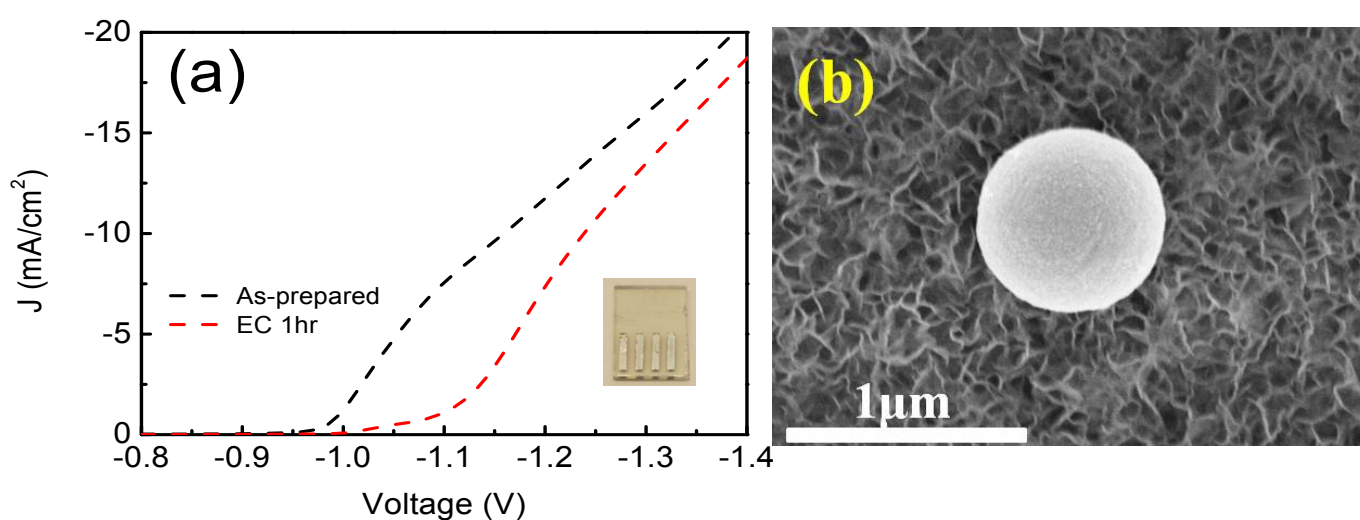

**Figure S8.** (a) Cathodic waves of cyclic voltammetry for nickel. The inset is a photograph of the nickel strips. (b) Gold nanoparticles suspended on the scaffolds of hydrophobic  $\text{Ni}(\text{OH})_2$  at -2V.
